# Supplementary material for: Blocking drug efflux mechanisms facilitate genome engineering process in hypercellulolytic fungus, Penicillium funiculosum NCIM1228
Source: PubMed Central journal article supplement (PMC7836482; doi:10.1186/s13068-021-01883-4), 2021-01-25
Supplement: 13068_2021_1883_MOESM1_ESM.pdf [file 13068_2021_1883_MOESM1_ESM.pdf]

## Supplementary Information for

### “Blocking drug efflux mechanisms facilitate genome engineering process in hypercellulolytic fungus *Penicillium funiculosum* NCIM1228”

**Supplementary Table S1. List of primers used in the study**

**Supplementary Table S2. Determination of minimal inhibitory concentration of antibiotics for *P. funiculosum* NCIM1228.**

**Supplementary Fig. S1 Susceptibility of *P. funiculosum* NCIM1228 towards hygromycin, zeocin and nourseothricin.**

**Supplementary Fig. S2 Sensitivity of *P. funiculosum* NCIM1228 towards antibiotics on PD and LMP agar supplemented with Triton X-100 and chlorpromazine after 14 days of incubation.**

**Supplementary Fig. S3 Sensitivity of *P. funiculosum* NCIM1228 towards antibiotics on LMP agar supplemented with chlorpromazine, Triton X-100 and both after 7 days of incubation.**

**Supplementary Fig. S4 Random integration of cassette in the genome of *P. funiculosum*.**

**Supplementary Fig. S5 Deletion of *cbh1*, *ku70* and *pyr4* genes in *P. funiculosum* NCIM1228.**

**Supplementary Fig. S6 Genetic characterization of *cbh1* deletion transformants.**

**Supplementary Table S1. List of primers used in the study**

| Primer Name      | Primer Sequence (5'-3')                            |
|------------------|----------------------------------------------------|
| EGFP F           | ATGGTGAGCAAGGGCGAG                                 |
| EGFP R           | TTACTTGTACAGCTCGTCCATG                             |
| pBIF hph IR F    | AGATCGTTATGTTTATCGGCAC                             |
| pBIF hph IR R    | GCTGTTATGCGGCCATTGTC                               |
| hyg_IR_F         | AGATCGTTATGTTTATCGGCAC                             |
| CBHI_R_IR        | ATCTAACGTAATGGCACCCGG                              |
| 1440_CBHI_F      | TAGTTCGTCAGCGTCAACTG                               |
| CBHI_IR_R        | GGTCACGAAGTAGAGGGCA                                |
| CBHI 1kb up      | CATCTTCGAATATCCCAACAGGTCGATCC                      |
| CBHI 1.5 kb dn R | GAGATACTCGGATTGACGTCGCGC                           |
| CBHI 300bp up F  | GGACGTATAGATCAGGGACTGTGAGG                         |
| CBHI 300bp up R  | TACGGCTTGAGATGGAATTTTGGGC                          |
| <i>Hph</i> cas F | AATCGACACAATGTCCTGCAGTAATCAATCC                    |
| <i>Hph</i> cas R | GGTTCACGACGGTGAACCACTAGTACGCGTGGATCCGTC            |
| <i>Hph int</i> R | TTCTCAAGCTTGGATTCACCTCAC                           |
| <i>Hph int</i> F | TTAGCTCATTCAAGACTTTATTTACGCC                       |
| Zeocin cas F     | CAGAAGCTTCTGATTTAATAGCTCCATGTC                     |
| Zeocin cas R     | GACTGAATTCCATCTGTAGGGCGTCC                         |
| Ku70 F           | TAACGCCGAATTAATATGGCTGACAGTAACCCCC                 |
| Ku70 R           | ACACCGCGCGCGTTAACCCCTTTCGGTCAAATAAC                |
| PyrG 500bp up F  | acgcTCTAGACGCCACGGCAATCTAGTCG                      |
| PyrG 500bp dn R  | ACGCCGCGCGCGTACAAAGTGCTATCCCTATCAATGAAATTAC<br>CAG |
| PyrG seq F       | CCGAATGGTCTTGGACGG                                 |
| PyrG seq R       | GACTGTCAATGTAAACAAGTTGATGTGGG                      |

**Supplementary Table S2. Determination of minimal inhibitory concentration of antibiotics for *P. funiculosum* NCIM1228.** Number of NCIM1228 colonies appeared after 10<sup>4</sup> spores were plated on different concentrations of antibiotics after 48 hours of incubation.

|                        | 25 µg/ml      | 50 µg/ml     | 75 µg/ml | 100 µg/ml |
|------------------------|---------------|--------------|----------|-----------|
| <b>Hygromycin</b>      | <b>128±34</b> | <b>47±5</b>  | <b>0</b> | <b>0</b>  |
| <b>Zeocin</b>          | <b>96±27</b>  | <b>44±14</b> | <b>0</b> | <b>0</b>  |
| <b>Nouroseothricin</b> | <b>21±6</b>   | <b>0</b>     | <b>0</b> | <b>0</b>  |

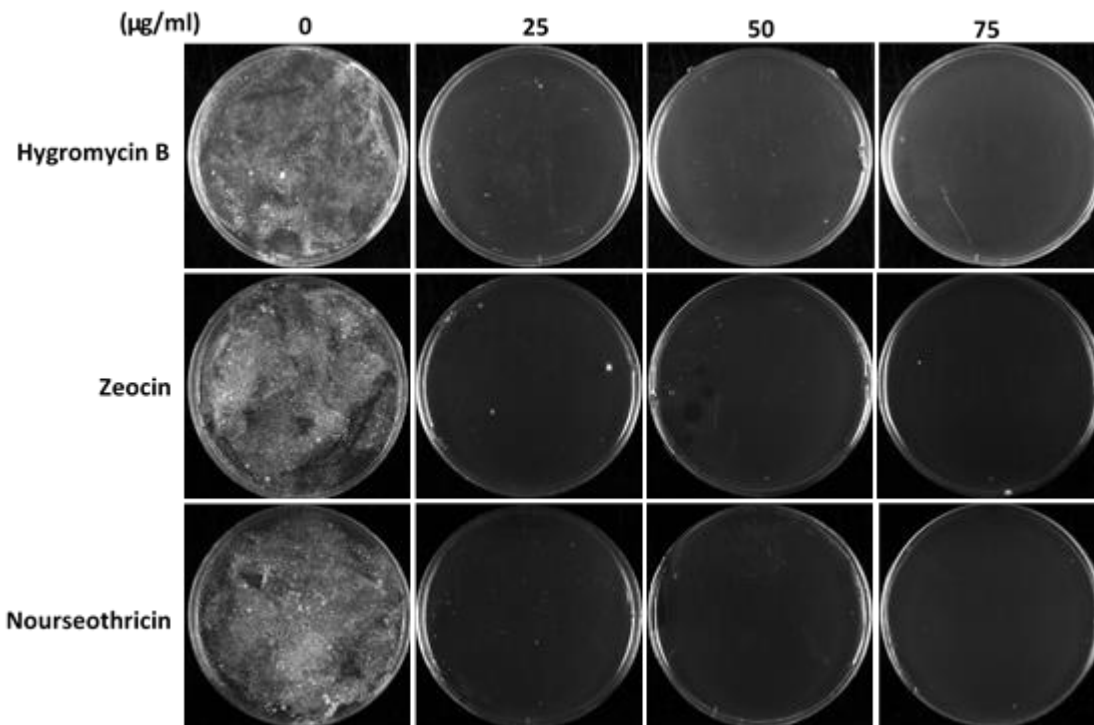

**Supplementary Fig. S1 Susceptibility of *P. funiculosum* NCIM1228 towards hygromycin, zeocin and nourseothricin.**  $10^4$  spores were plated on PD agar plates having antibiotics ranging from 25 to 100  $\mu\text{g/ml}$ . Complete inhibition of NCIM1228 was found at 75  $\mu\text{g/ml}$  of hygromycin and zeocin and 50  $\mu\text{g/ml}$  of nourseothricin after 48 hours of incubation.

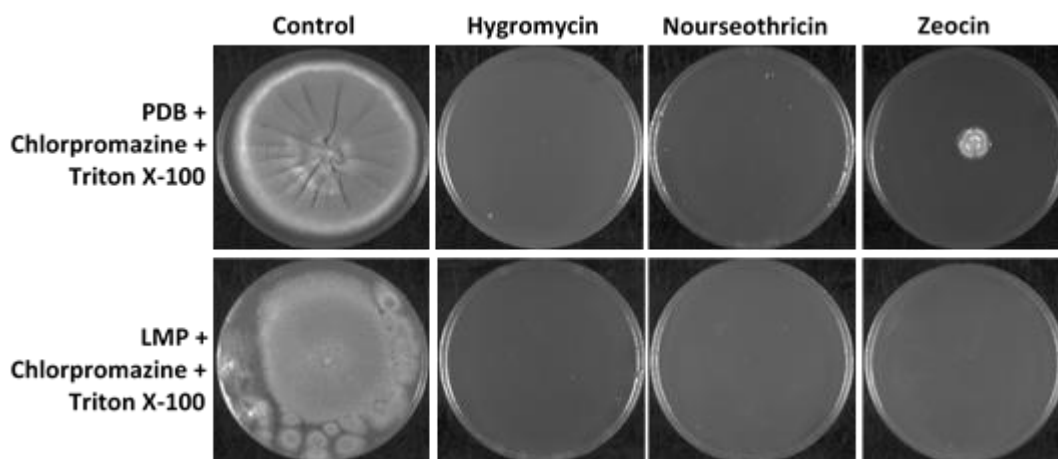

**Supplementary Fig. S2 Sensitivity of *P. funiculosum* NCIM1228 towards antibiotics on PD and LMP agar supplemented with Triton X-100 and chlorpromazine after 14 days of incubation.**

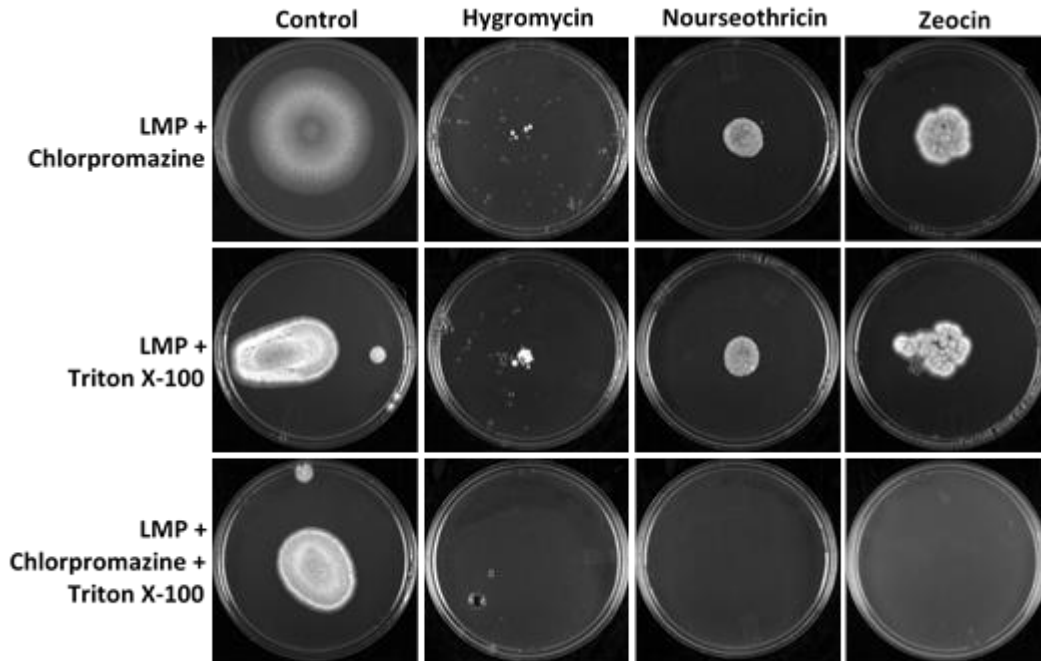

**Supplementary Fig. S3 Sensitivity of *P. funiculosum* NCIM1228 towards antibiotics on LMP agar supplemented with chlorpromazine, Triton X-100 and both after 7 days of incubation.**

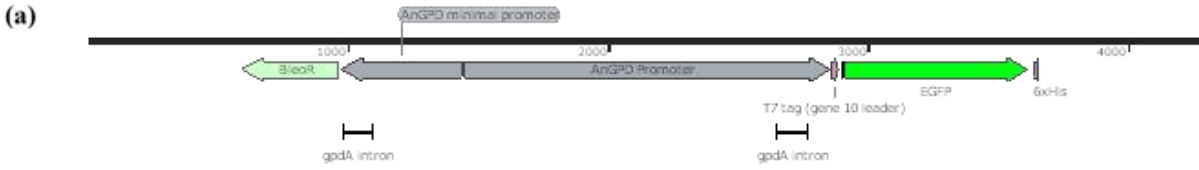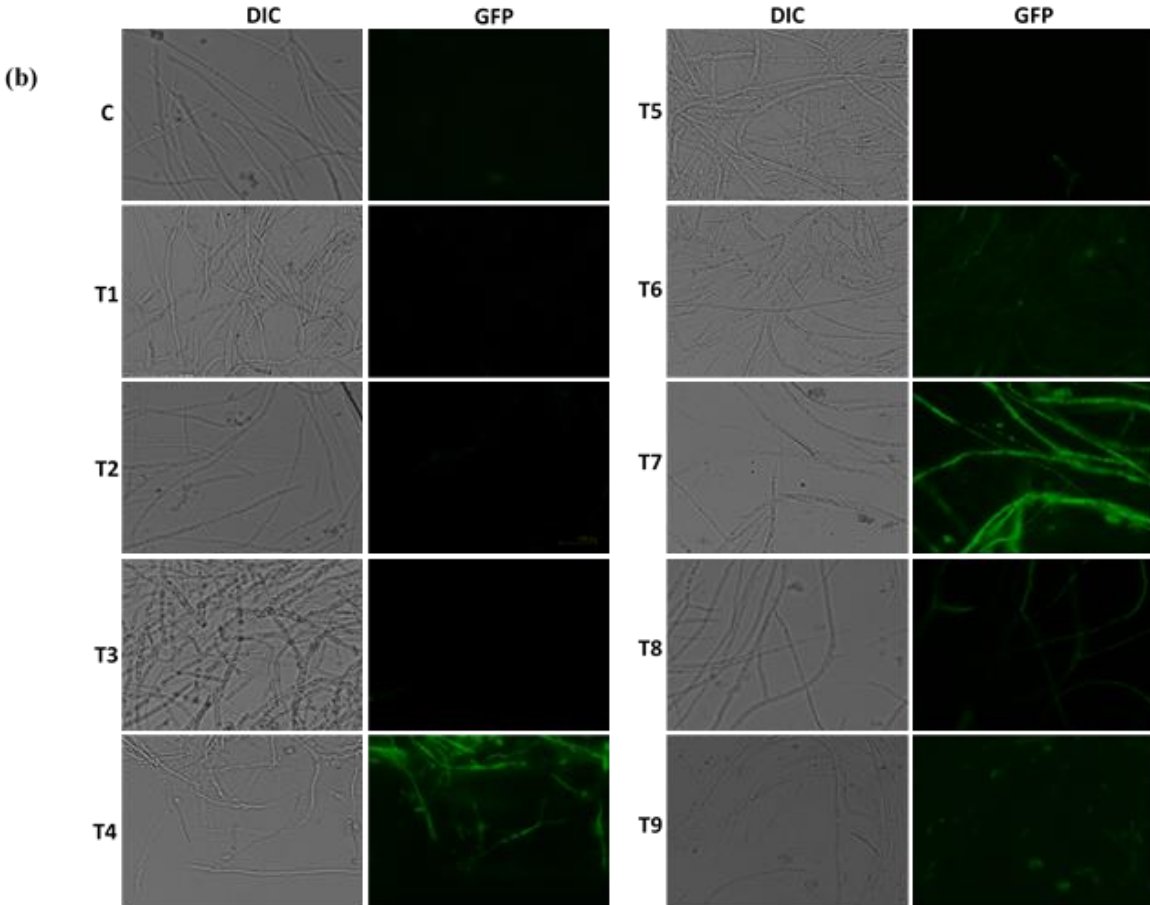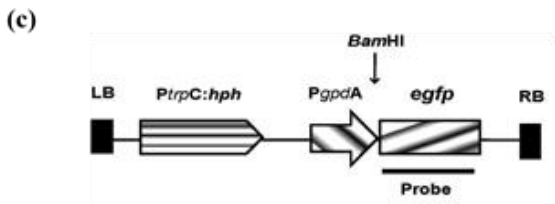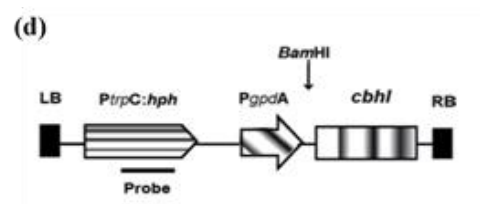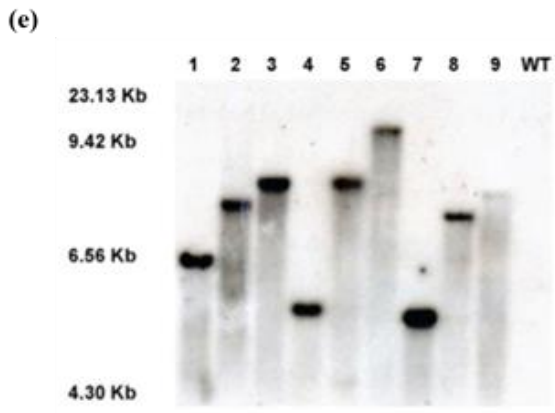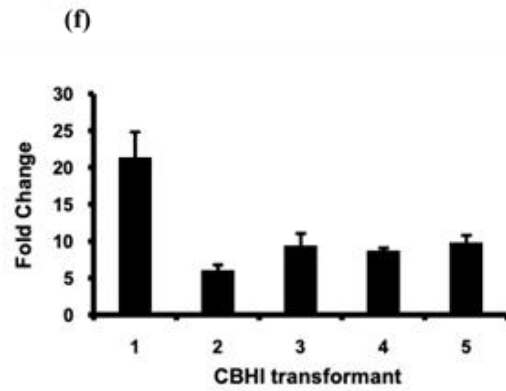

**Supplementary Fig. S4 Random integration of cassette in the genome of *P. funiculosum*** (a) Schematic representation of pAN-egfp expression cassette used for protoplast LiAc-PEG based transformation in *P. funiculosum* NCIM1228. (b) Transformants of randomly integrated pBIF-EGFP show varied levels of expression. Schematic representation of (c) pBIF-EGFP and (d) pBIF-cbh1 to show the probes used for southern blots and position of BamHI restriction enzyme used for generating DNA fragments. (e) Southern blot of pBIF-cbh1 transformants showing integration of T-DNA having CBHI gene. A 460 bp fragment from hygromycin resistance cassette was used as probe. NCIM1228 (WT) was taken as negative control. (f) The transcriptional expression of cbhI in pBIF-cbh1 transformants were measured by quantitative real-time PCR after growing for 24 h in the presence of glucose. The expression levels were normalized to NCIM1228 and plotted.

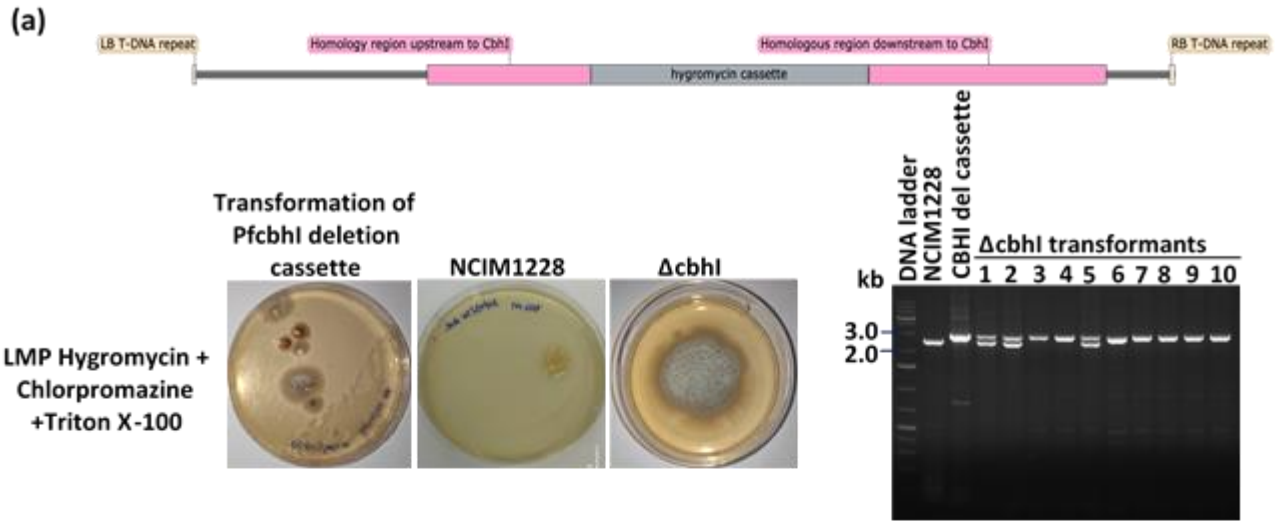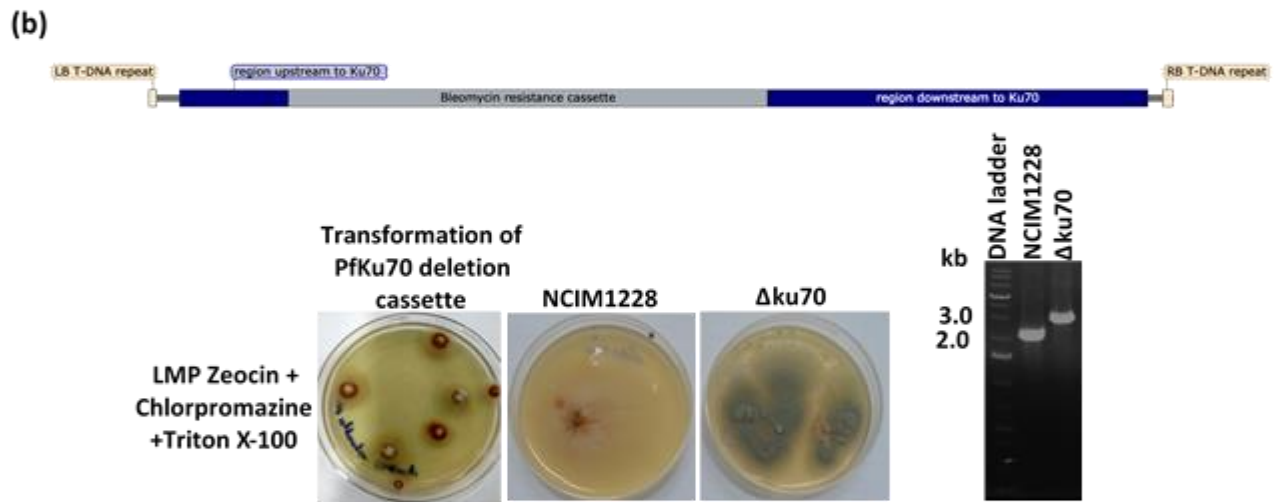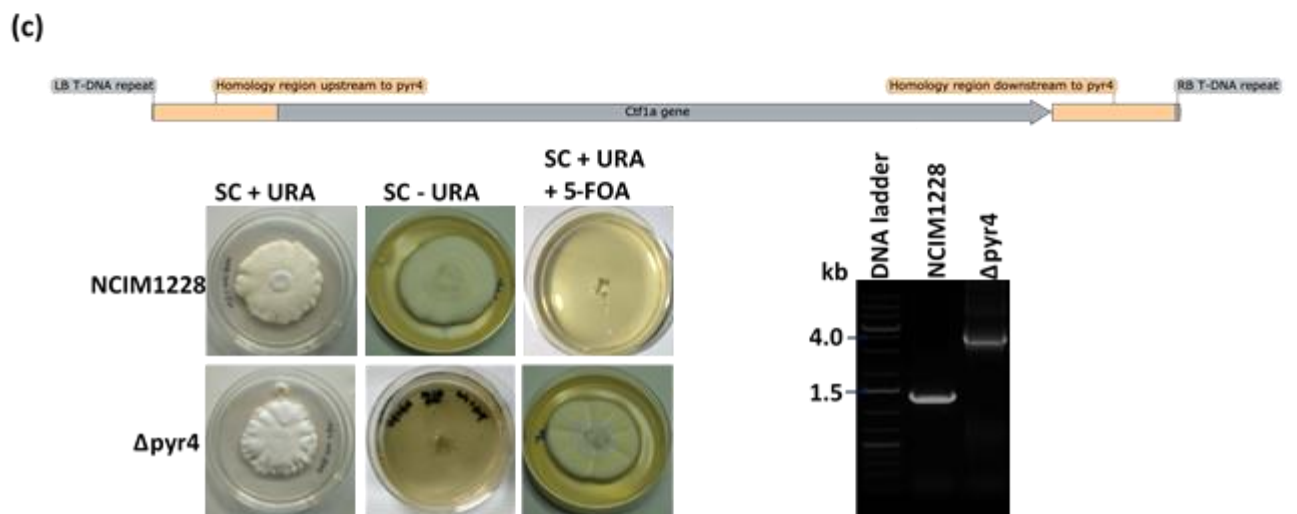

**Supplementary Fig. S5 Deletion of *cbh1*, *ku70* and *pyr4* genes in *P. funiculosum* NCIM1228.**

(a) Schematic representation of *cbh1* deletion cassette transformed. Left panel shows the transformation of *cbh1* deletion cassette via *Agrobacterium*-mediated method and appearance of hygromycin resistant transformants. Single spores from transformed colonies were grown on LMP hygromycin plates to achieve pure transformed colonies. Right panel shows amplification of *cbh1* deletion cassette in hygromycin resistant transformants. Primers corresponding to 300bp upstream and downstream to *cbh1* gene were used for amplification. As expected, NCIM1228 showed amplification of 2166 bp fragment (1566 bp *cbhI* ORF + 600 bp flanking regions) whereas *cbhI* deletion strains showed amplification of 2516 bp fragment (1916 *hph* resistance gene cassette + 600 bp flanking regions). Three of the transformants also showed amplification for both native *cbh1* gene as well as *cbh1* deletion cassette suggesting random integration and therefore, intact *cbhI* gene in these transformants. (b) Schematic representation of *ku70* deletion cassette transformed. Left panel shows the transformation of *ku70* deletion cassette and appearance of zeocin resistant transformants. Right panel shows amplification of native *ku70* gene (2058 bp) from NCIM1228 and *ku70* deletion cassette (2860 bp) from one of the transformants showing using *ku70* forwards and reverse primers. (c) Schematic representation of *pyr4* deletion cassette transformed. Left panel shows the transformation of *pyr4* deletion cassette via *Agrobacterium*-mediated method and 5-FOA resistant transformants which showed no growth in the absence of uracil. Right panel shows amplification of native *pyr4* gene (1894 bp) from NCIM1228 and *pyr4* deletion cassette (4090 bp) from one of the transformants using primers for region 500bp upstream and downstream to *pyr4* gene.



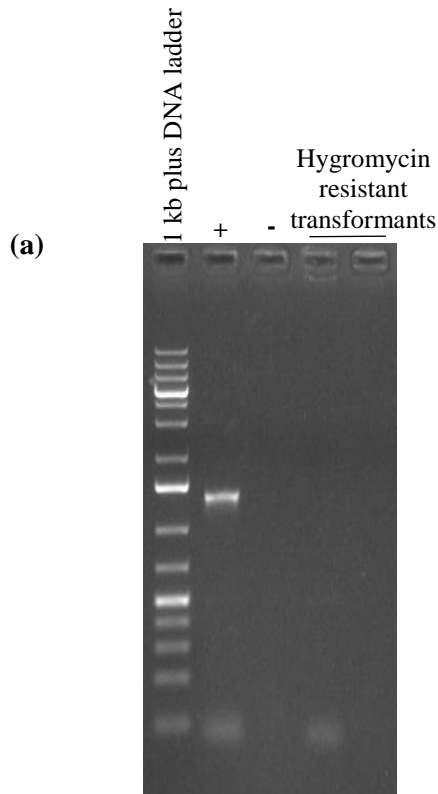

(b)

```

S10      ACTGAGCTAAAACATACTTCAGCACTGTAAGCGCCAGCCTAA-----
REF      ACTGAGCTAAAACATACTTCAGCACTGTAAGCGCCAGCCTAAGTTATGCTATGTTAGACT
          *****
                                     cbhI sgRNA IV

S10      -----GATTCGGCTGGTACTGGCTTTTGTGATCCCCAGTATCATGTAAAGGTATCCGCCT
REF      GTCCGGATTGGCTGGTACTGGCTTTTGTGATCCCCAGTATCATGTAAAGGTATCCGCCT
          *****
          PAM
  
```

(c)

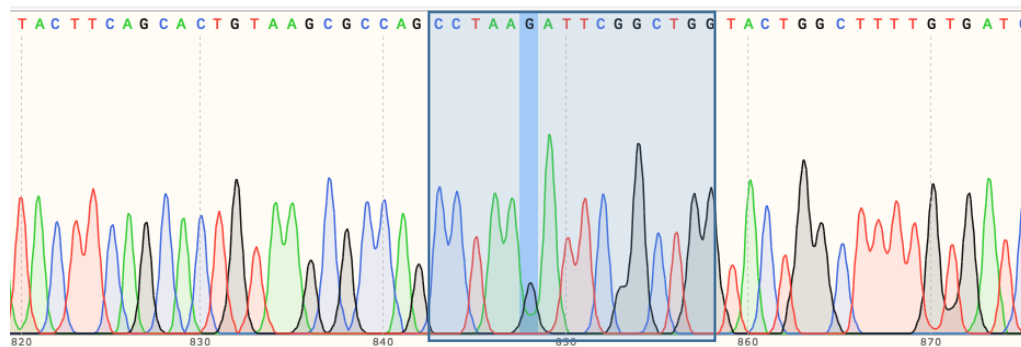

**Supplementary Fig. S6 Genetic characterization of *cbhI* deletion transformants.** (a) Two Hygromycin resistant transformants appeared in control experiment when NCIM1228 protoplasts were transformed only with repair template. None of them showed amplification of 1319 bp fragment amplified by primers *cbhI* 1kb up F and *Hph int R*. The amplicon refers to the region 1kb upstream to *cbhI* ORF and 200bp of *hph* resistance cassette. Repair template was amplified as positive control and NCIM1228 was taken as negative control. (b) Sequence alignment of

reference *cbh1* gene sequence (ref) of *P. funiculosum* NCIM1228 and S10 is the sequence of one of the *cbhI* deletion mutant which showed mutation at the sgRNA site after DNA repair (c) Mutation found in one of the transformants near the sgRNA IV site when sgRNA external to *cbhI* ORF were used for deleting *cbh1*. The boxed nucleotides show the new junction formed after the deletion of sgRNA and some extra nucleotides.
